# Supplementary material for: Asymmetric supercapacitors with high energy densities
Source: Royal Society of Chemistry journal article supplement (doi:10.1039/c9nr02607j), 2019-01-01
Supplement: c9nr02607j1.pdf [file c9nr02607j1.pdf]

## **Asymmetric Supercapacitors with High Energy Densities**

Zijun Shi,<sup>a</sup> Wenjing Chu,<sup>a</sup> Yongdan Hou,<sup>b</sup> Yanfang Gao,<sup>a,\*</sup> and Nianjun Yang<sup>c,\*</sup>

<sup>a</sup> College of Chemical Engineering, Inner Mongolia University of Technology,  
Hohhot 010051, People's Republic of China

<sup>b</sup> College of Engineering, Kwame Nkrumah University of Science and Technology,  
Kumasi, Ghana

<sup>c</sup> Institute of Materials Engineering, University of Siegen, Siegen 57076, Germany

E-mail addresses: yf\_gao@imut.edu.cn; nianjun.yang@uni-siegen.de

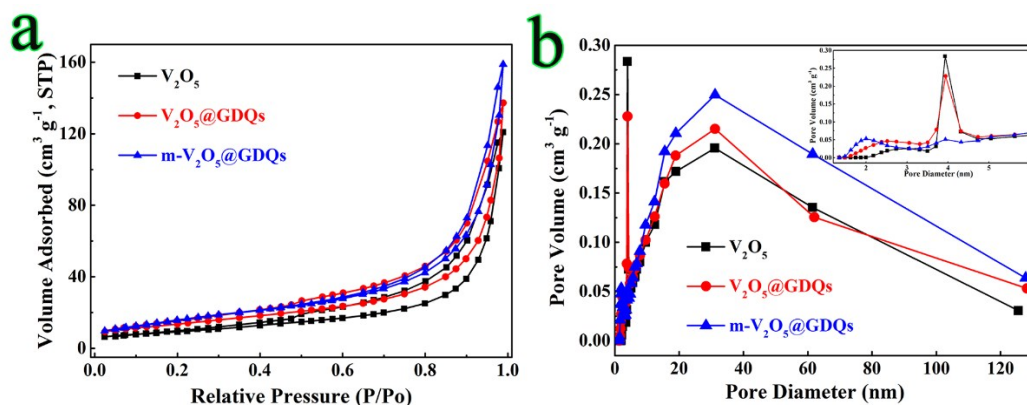

**Fig. S1** (a) Nitrogen adsorption–desorption isotherms and (b) pore size distribution curves of  $V_2O_5$ ,  $V_2O_5@GDQs$ , and  $m-V_2O_5@GDQs$

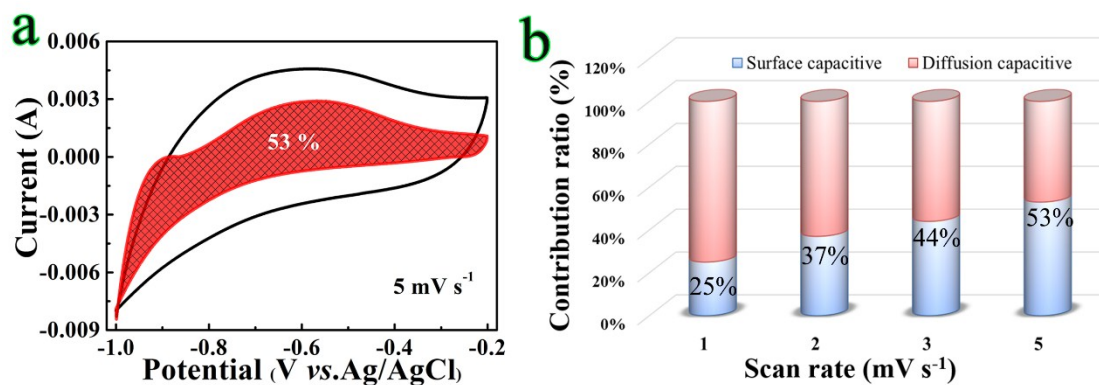

**Fig. S2** (a) Separation of the capacitive (shaded region) and diffusion currents in the m-V<sub>2</sub>O<sub>5</sub>@GQDs at a scan rate of 5 mVs<sup>-1</sup>. (b) Contribution ratio of the diffusion-controlled and capacitance-controlled charges at different scan rates.

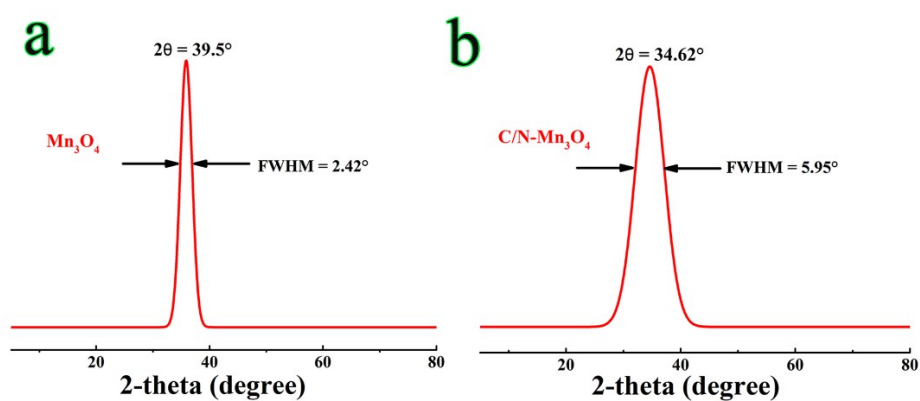

**Fig. S3** The curves show full width at half maximum (FWHM) of (a)  $\text{Mn}_3\text{O}_4$  and (b)  $\text{C/N-Mn}_3\text{O}_4$ .

**Table S1.** Comparison of the specific capacitance of other V<sub>2</sub>O<sub>5</sub>-based supercapacitor.

| Preparation method                      | Potential window | Electrolyte                        | Current density       | Specific capacitance    | Ref. |
|-----------------------------------------|------------------|------------------------------------|-----------------------|-------------------------|------|
| m-V <sub>2</sub> O <sub>5</sub> @ GQDs  | -1 to -0.2 V     | 1M Li <sub>2</sub> SO <sub>4</sub> | 2 A g <sup>-1</sup>   | 761 F g <sup>-1</sup>   | This |
| rGO/V <sub>2</sub> O <sub>5</sub>       | -0.8 to 0.8 V -  | 1 M LiClO <sub>4</sub> /PC         | 0.1 A g <sup>-1</sup> | 384 F g <sup>-1</sup>   | 23   |
| V <sub>2</sub> O <sub>5</sub> @PPy      | 0.4 to 0.5 V     | 1M Na <sub>2</sub> SO <sub>4</sub> | 0.2 A g <sup>-1</sup> | 334 F g <sup>-1</sup>   | 39   |
| N-GA@V <sub>2</sub> O <sub>5</sub> NWAs | -0.3 to 0.7 V    | 8 M LiCl                           | 0.5 A g <sup>-1</sup> | 710 F g <sup>-1</sup>   | 40   |
| V <sub>2</sub> O <sub>5</sub>           | -0.2 to 0.6 V    | 1M Na <sub>2</sub> SO <sub>4</sub> | 2 mV s <sup>-1</sup>  | 256 F g <sup>-1</sup>   | 41   |
| N-CNFs/V <sub>2</sub> O <sub>5</sub>    | -0.1 to 1 V      | 1M Na <sub>2</sub> SO <sub>4</sub> | 0.5 A g <sup>-1</sup> | 595.1 F g <sup>-1</sup> | 42   |
